RESEARCH ARTICLE

# Carriage and Genetic Diversity of Methicillin-Resistant *Staphylococcus aureus* among Patients and Healthcare Workers in a Serbian University Hospital

Ivana Cirkovic<sup>1\*</sup>, Srdjan Stepanovic<sup>1</sup>, Robert Skov<sup>2</sup>, Jasmina Trajkovic<sup>1</sup>, Anita Grgurevic<sup>3</sup>, Anders Rhod Larsen<sup>2</sup>

**1** Institute of Microbiology and Immunology, Faculty of Medicine, University of Belgrade, Belgrade, Serbia,

**2** Department of Microbiological Surveillance and Research, Statens Serum Institut, Copenhagen, Denmark,

**3** Institute of Epidemiology, Faculty of Medicine, University of Belgrade, Belgrade, Serbia

\* [cirkoviciv@yahoo.com](mailto:cirkoviciv@yahoo.com)

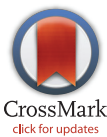

## Abstract

### Objectives

There is a paucity of data on methicillin-resistant *Staphylococcus aureus* (MRSA) epidemiology among Balkan countries. The aim of our study was to determine the prevalence of nasal and pharyngeal carriage and diversity of MRSA among patients and healthcare workers (HCWs) in the major referral centre in Serbia, and to evaluate performance of three different media for MRSA screening.

### Methods

Nasal and pharyngeal swabs were obtained from 195 patients and 105 HCWs in Emergency Department (ED), Surgical Department (SD) and Medical Department (MD). After broth enrichment, samples were inoculated onto MRSA-ID, ORSA and oxacillin-MSA and incubated for 24/48 hours. Characterisation of isolated MRSA strains was determined by MLVA, *spa*, *SCCmec* and *agr* typing, PVL genes detection and antimicrobial susceptibility.

### Results

MRSA carriage prevalence was 11.8% in patients and 7.6% in HCWs. Introduction of pharyngeal swabs in screening procedure increased MRSA carriage rate by over 30%. Variable found to be independently associated with an increased risk for MRSA carriage was ED (odds ratio (OR) = 4.45, 95% confidence interval (CI) 1.78-11.14). A higher risk of multidrug-resistant MRSA carriage was observed among patients (OR = 22; 95% CI 1.92-251.54). CC5-MRSA-*SCCmecI* was the dominant clone among patients and HCWs in ED and MD, while high genetic diversity of community-associated MRSA (CA-MRSA) was shown in SD especially among HCWs. MRSA-ID was superior to the other tested media with a sensitivity/specificity of 95.2% and 99.6% after 48 hours of incubation.

## OPEN ACCESS

**Citation:** Cirkovic I, Stepanovic S, Skov R, Trajkovic J, Grgurevic A, Larsen AR (2015) Carriage and Genetic Diversity of Methicillin-Resistant *Staphylococcus aureus* among Patients and Healthcare Workers in a Serbian University Hospital. PLoS ONE 10(5): e0127347. doi:10.1371/journal.pone.0127347

**Academic Editor:** Herminia de Lencastre, Rockefeller University, UNITED STATES

**Received:** December 17, 2014

**Accepted:** April 13, 2015

**Published:** May 20, 2015

**Copyright:** © 2015 Cirkovic et al. This is an open access article distributed under the terms of the [Creative Commons Attribution License](https://creativecommons.org/licenses/by/4.0/), which permits unrestricted use, distribution, and reproduction in any medium, provided the original author and source are credited.

**Data Availability Statement:** All relevant data are within the paper and its Supporting Information files.

**Funding:** These authors have no support or funding to report.

**Competing Interests:** The authors have declared that no competing interests exist.

## Conclusions

These results indicate high MRSA carriage rate in the hospital and emergence of CA-MRSA through HCWs in these settings. MRSA-ID was the optimal available choice for MRSA screening.

## Introduction

Methicillin-resistant *Staphylococcus aureus* (MRSA) is one of the most significant healthcare-associated (HA) and community-associated (CA) pathogen, causing a wide range of infections, from mild skin and soft tissue infections to life-threatening invasive diseases. The MRSA infections are associated with higher morbidity, mortality, prolonged length of hospital stay and higher healthcare costs as compared to methicillin-susceptible staphylococci [1].

Strategies to control the transmission of MRSA in hospitals require baseline knowledge of the prevalence and characteristics of circulating MRSA strains, which can be obtained by active surveillance. Studies of MRSA carriage in the European hospitals have shown large geographic variations in MRSA prevalence [2] and genetic diversity of strains [3]. In Serbia, the National Reference laboratory for staphylococci was established in 2008, and the data presented here are the first surveillance data on MRSA in Serbia since the dissolution of Yugoslavia in 1991.

Screening and rapid identification of MRSA carriage among patients and healthcare workers (HCWs) are essential steps in controlling MRSA spread in hospitals. Use of selective media involving both chromogenic media and preincubation steps has been proposed for accurate isolation of MRSA [4,5]. Many studies have evaluated the performance of chromogenic media in detecting MRSA [4–10], but several of these are laboratory based studies [4,5], i.e. well-defined collections of staphylococci were used for testing, whereas testing of primary specimens may be of more importance [6,7,10].

The aims of the present study were to: (i) provide data of MRSA carriage among hospitalised patients and HCWs in the largest healthcare facility in Serbia, (ii) determine the genetic lineages of the circulating MRSA and (iii) evaluate the performance of selective media for the detection of MRSA in screening sample after selective enrichment.

## Materials and Methods

### Study design, site and population

A cross-sectional study was conducted between November 2008 and January 2009 at the Clinical Centre of Serbia (CCS), which is a university-affiliated 3000-bed tertiary teaching hospital. CCS serves a population of over 2 million and acts as a major referral health facility in Serbia and some neighbouring countries (Bosnia and Herzegovina, Montenegro).

Screening was conducted in the Emergency Department (ED), Surgical Department (SD) and Medical Department (MD), which are situated 100–200 meters apart in separate buildings. Clinical conditions of patients in the ED ranged from various surgical or medical conditions; in the SD, clinical conditions of patients were primarily surgery related; in the MD, clinical conditions of patients were primarily medically related. Participation was voluntary and all participants signed informed consent form prior to their inclusion in the study. Descriptive information regarding participants' age, sex, diagnosis, department and period of hospitalisation was collected. The study protocol was approved by the Ethics Committee of Faculty of Medicine, University of Belgrade, Belgrade, Serbia [no. 013/2008].

**Table 1. Demographic characteristics of patients and healthcare workers (HCWs) at the Clinical Centre of Serbia, Serbia.**

| Characteristics                      | Level        | Patients (n = 195) | HCWs (n = 105) |
|--------------------------------------|--------------|--------------------|----------------|
| Sex [n (%)]                          | Female       | 78 (40)            | 100 (95.2)     |
|                                      | Male         | 117 (60)           | 5 (4.8)        |
| Department [n (%)]                   | ED           | 66 (33.8)          | 29 (27.6)      |
|                                      | SD           | 81 (41.6)          | 59 (56.2)      |
|                                      | MD           | 48 (24.6)          | 17 (16.2)      |
| Age group [n (%)]                    | < 65         | 138 (70.8)         | 105 (100)      |
|                                      | ≥ 65         | 57 (29.2)          | 0 (0)          |
| Patient underlying diagnosis [n (%)] | Surgical     | 132 (67.7)         | /              |
|                                      | Non-surgical | 63 (32.3)          | /              |
| Duration of hospitalization [n (%)]  | ≤ 7 days     | 151 (77.4)         | /              |
|                                      | > 7 days     | 44 (22.6)          | /              |

ED, Emergency Department; SD, Surgical Department; MD, Medical Department.

doi:10.1371/journal.pone.0127347.t001

## Sampling

For the present investigation specimens were taken from 195 hospitalised patients (mean age was 58.3+14.7; ages ranged from 19 to 84) and 105 HCWs (mean age was 44.1+10.3; ages ranged from 22 to 61). Participants' response rate was 100% in each ward/department.

Samples for each person included two swabs, one taken from both anterior nares and one from the throat. Demographic characteristics of the study population are shown in Tables 1 and S1.

## Culture methods

After the collection, all samples were processed within 2h. Each swab was inoculated in 3 mL of Mueller-Hinton broth (bioMérieux, France) supplemented with 6.5% NaCl, and incubated 24h at 35°C, in atmospheric air. A 50 µl amount of the culture was inoculated onto chromogenic media MRSA-ID (bioMérieux, France), oxacillin resistance screening agar (ORSA; HiMedia, India), and mannitol salt agar (MSA; bioMérieux, France) supplemented with 2 mg/L of oxacillin, which represent the available MRSA-screening media on the Serbian market. All inoculated plates were incubated at 35°C, in air, and read after 24h and 48h of incubation.

## Identification of isolates

In accordance with the manufacturers' instructions, a colony suggestive of MRSA was subcultured onto Columbia agar with 5% sheep blood (bioMérieux, France), and later confirmed by PCR for *nuc* [11] and *mecA* [12] genes. One isolate per patient/HCW was further tested.

## Antimicrobial susceptibility testing

Susceptibility to cefoxitin, chloramphenicol, ciprofloxacin, clindamycin, fusidic acid, erythromycin, gentamicin, kanamycin, linezolid, mupirocin, quinupristin-dalfopristin, penicillin, rifampin, tetracycline, tobramycin and trimethoprim/sulfamethoxazole (BioRad, USA) was performed by disk diffusion method and to vancomycin and teicoplanin by Etest (bioMérieux, France) in accordance to the European Committee on Antimicrobial Susceptibility Testing (EUCAST) recommendation (<http://www.eucast.org>). Multidrug resistance (MDR) was

defined as resistance of MRSA to three or more distinct antimicrobial classes in addition to beta-lactams.

## Molecular characterisation

Multiple-locus variable-number tandem-repeat assay (MLVA) was performed as previously described [13]. Representatives for each MLVA type were subjected to *spa* typing as previously described [14]. The *spa* types were annotated into Multi Locus Sequence Typing (MLST) Clonal complexes (CCs) based on the *spa* repeat successions, information stored in the ridom and MLST database and literature searches (<http://www.ridom.de>, <http://www.mlst.net/>).

Determination of Staphylococcal Cassette Chromosome *mec* (SCC*mec*) types and *agr* type were done by previously described multiplex PCR [15,16]. *S. aureus* strains HT20020290 (SCC*mec* type I), HT20020285 (SCC*mec* type II), HT20030826 (SCC*mec* type III), HT20040068 (SCC*mec* type IV), HT20060580 (SCC*mec* type V), HT20020274 (SCC*mec* type VI), RN6390 (*agr* type 1), RN6607 (*agr* type 2), RN8465 (*agr* type 3) and RN4850 (*agr* type 4) served as positive controls.

Presence of Panton-Valentine leukocidin (PVL) encoding genes was determined by previously described PCR protocol [17]. *S. aureus* ATCC 49775 was used as the positive control.

## Statistical analysis

Descriptive statistics, chi-square test and logistic regression were applied in data analysis using SPSS 21+ statistical software. Univariate logistic regression was used to analyse the association between each risk variable (patient or HCW status, sex, age group, department, patient underlying diagnosis, duration of hospitalisation) and two outcomes: MRSA carriage and MDR MRSA carriage. Based on this model, variables associated with the outcome (MRSA carriage) at a level of significance  $P < 0.1$  were entered into the final model of the multivariate logistic regression, which was used to compute adjusted odds ratios (OR) and 95% confidence intervals (95% CI) to assess the independent associations of these variables with the outcome. A forward wald method was selected for this model. Variables remained in multivariate logistic regression analysis if they were independently associated with MRSA carriage at significance level of  $P < 0.05$ .

## Results

### MRSA carriage

A total of 31/300 (10.3%) participants in the study carried MRSA. Among hospitalised patients and HCWs MRSA carriage rate was 23/195 (11.8%) and 8/105 (7.6%) respectively. Distribution of MRSA carriers and non-carriers stratified by population characteristics are shown in [S1 Table](#) and [Table 2](#). Even though patients had higher risk of being carriers than HCWs [OR = 1.62, 95% CI 0.70–3.76] this difference was not significant ( $P = 0.261$ ). Patients in ED [OR = 2.61, 95% CI 1.32–5.17;  $P = 0.006$ ] were found to have higher risk of being MRSA carriers. The variable shown to be independently associated with an increased risk for MRSA carriage was ED hospital department [OR 4.45; 95% CI, 1.78–11.14;  $P = 0.001$ ].

The prevalence of MRSA nasal and throat and just nasal or throat carrier was similar. The presence of MRSA in throat swabs was higher among patients but for nasal swabs the prevalence was similar between patients and HCWs ([Table 3](#)).

**Table 2. Distribution of methicillin-resistant *Staphylococcus aureus* (MRSA) carriers and non-carriers among patients and healthcare workers (HCWs) stratified by department, sex, age group, patient underlying diagnosis and duration of hospitalisation at the Clinical Centre of Serbia, Serbia.**

| Stratifier                         | Group        | Patients and HCWs (n = 300) |             |       | Patients (n = 195) |             |       | HCWs (n = 105) |             |       |
|------------------------------------|--------------|-----------------------------|-------------|-------|--------------------|-------------|-------|----------------|-------------|-------|
|                                    |              | Carrier                     | Non-carrier | P*    | Carrier            | Non-carrier | P*    | Carrier        | Non-carrier | P*    |
| Sex [n (%)]                        | Female       | 17 (9.5)                    | 161 (90.5)  | 0.591 | 9 (11.5)           | 69 (88.5)   | 0.928 | 8 (8)          | 92 (92)     | 0.511 |
|                                    | Male         | 14 (11.5)                   | 105 (88.5)  |       | 14 (12)            | 103 (88)    |       | 0 (0)          | 5 (100)     |       |
| Department [n (%)]                 | ED           | 17 (17.9)                   | 78 (82.1)   | 0.011 | 15 (22.7)          | 51 (77.3)   | 0.003 | 2 (6.9)        | 27 (93.1)   | 0.374 |
|                                    | SD           | 11 (7.8)                    | 130 (92.2)  |       | 5 (6.2)            | 76 (93.8)   |       | 6 (10.2)       | 53 (89.8)   |       |
|                                    | MD           | 3 (4.6)                     | 62 (95.4)   |       | 3 (6.3)            | 45 (93.7)   |       | 0 (0)          | 17 (100)    |       |
| Age group                          | < 65         | 25 (10.3)                   | 218 (89.7)  | 0.958 | 17 (12.3)          | 121 (87.7)  | 0.724 | 8 (7.6)        | 97 (92.4)   | /     |
|                                    | ≥ 65         | 6 (10.5)                    | 51 (89.5)   |       | 6 (10.5)           | 51 (89.5)   |       | /              | /           |       |
| Patient underlying diagnosis       | Surgical     | 16 (11.5)                   | 116 (88.5)  | 0.838 | 16 (11.5)          | 116 (88.5)  | 0.838 | /              | /           | /     |
|                                    | Non-surgical | 7 (11.1)                    | 56 (88.9)   |       | 7 (11.1)           | 56 (88.9)   |       | /              | /           |       |
| Duration of hospitalization[n (%)] | ≤ 7 days     | 21 (13.9)                   | 130 (86.1)  | 0.090 | 21 (13.9)          | 130 (86.1)  | 0.090 | /              | /           | /     |
|                                    | > 7 days     | 2 (5.5)                     | 42 (94.5)   |       | 2 (5.5)            | 42 (94.5)   |       | /              | /           |       |

\* chi-square statistic test; ED, Emergency Department; SD, Surgical Department; MD, Medical Department.

doi:10.1371/journal.pone.0127347.t002

### Antimicrobial susceptibility

Susceptibility testing on one isolate from each MRSA carrier revealed that 29/31 (93.5%) MRSA isolates were resistant to one or more antibiotics in addition to beta-lactam antibiotics, while two isolates (from HCWs) were only resistant to beta-lactams. MDR was noted in 26 (83.9%) isolates. Patients had a higher risk of MDR MRSA carriage compared with HCWs [OR = 22; 95% CI 1.92–251.54; P = 0.013]. MDR MRSA carriage was not associated with sex, age group, patient underlying diagnosis, department or duration of hospitalisation.

High levels of resistance among isolated MRSA strains were noted for aminoglycosides (gentamicin: 87.1%, kanamycin 90.3% and tobramycin 87.1%), ciprofloxacin (80.6%) and erythromycin and clindamycin (54.8%) with only two strains exhibiting inducible resistance, whereas resistance to chloramphenicol was 16.1%, tetracycline 12.9%, rifampin 9.7% and fusidic acid 3.2%. All MRSA isolates were susceptible to linezolid, mupirocin, quinupristin-dalfopristin, teicoplanin, trimethoprim/sulfamethoxazole and vancomycin.

Antibiograms were generally well-correlated with the MLVA and *spa* type results except for the MLVA type E clade (*spa* type *t595*, ST152/ST377) where strains exhibited various antibiograms (Table 4).

**Table 3. Presence of methicillin-resistant *Staphylococcus aureus* (MRSA) in nasal and throat swab specimens obtained from patients and healthcare workers (HCWs) at the Clinical Centre of Serbia, Belgrade.**

| Result for     |                 | Number (%) of MRSA carriers |           |                   |
|----------------|-----------------|-----------------------------|-----------|-------------------|
| Nasal specimen | Throat specimen | Patients                    | HCWs      | Patients and HCWs |
| Positive       | Positive        | 9 (4.6)                     | 2 (1.9)   | 11 (3.7)          |
| Positive       | Negative        | 6 (3.1)                     | 4 (3.8)   | 10 (3.3)          |
| Negative       | Positive        | 8 (4.1)                     | 2 (1.9)   | 10 (3.3)          |
| Negative       | Negative        | 172 (88.2)                  | 97 (92.4) | 269 (89.7)        |
| Total positive |                 | 23 (11.8)                   | 8 (7.6)   | 31 (10.3)         |

doi:10.1371/journal.pone.0127347.t003

**Table 4. Characteristics of 31 methicillin-resistant *Staphylococcus aureus* (MRSA) strains isolated from nasal and throat swab specimens obtained from patients and healthcare workers (HCWs) at the Clinical Centre of Serbia, Serbia.**

| CC            | MLVA type (number of strains patients /HCWs) | <i>spa</i> type | <i>spa</i> repeats succession             | SCC <i>mec</i> type | <i>agr</i> type | PVL positive strains | Resistance profile (>50% of isolates)                                                                |
|---------------|----------------------------------------------|-----------------|-------------------------------------------|---------------------|-----------------|----------------------|------------------------------------------------------------------------------------------------------|
| 5             | A (13/1)                                     | t001            | 26-30-17-34-17-20-17-12-17-16             | I                   | 2               | 0                    | GEN, KAN, TOB, ERY, CLI, CIP                                                                         |
|               | B (7/1)                                      | t041            | 26-30-17-34-17-20-17-34-17-20-17-12-17-16 | I                   | 2               | 0                    | GEN, KAN, TOB, CIP                                                                                   |
|               | C (0/2)                                      | t242            | 26-23-17-13-17-20-17-12-17-16             | V                   | 2               | 0                    | GEN, KAN, TOB, CHL                                                                                   |
| 8             | D (2/1)                                      | t030            | 15-12-16-02-24-24                         | III                 | 1               | 0                    | GEN, KAN, TOB, ERY, CLI, CIP, RIF, TET                                                               |
| ST152/<br>377 | E (1/1)                                      | t595            | 07-56-12-17-16-16-33-31-57-31-57-12       | V                   | 1               | 1 (patient)          | GEN, KAN, TOB, TET, CHL & other strain was susceptible to all tested antibiotics except beta-lactams |
| 22            | F (0/1)                                      | t005            | 26-23-13-23-31-05-17-25-17-25-16-28       | V                   | 1               | 0                    | susceptible to all tested antibiotics except beta-lactams                                            |
| 80            | G (0/1)                                      | t044            | 07-23-12-34-34-33-34                      | IV                  | 3               | 1 (HCW)              | KAN, FA                                                                                              |

CC, clonal complex; MLVA, Multiple-locus variable-number tandem-repeat assay; SCC*mec*, staphylococcal chromosome cassette *mec*; PVL, Pantone–Valentine leukocidin; GEN, gentamicin; KAN, kanamycin; TOB, tobramycin; ERY, erythromycin; CLI, clindamycin; CIP, ciprofloxacin; RIF, rifampin; TET, tetracycline; CHL, chloramphenicol; FA, fusidic acid.

doi:10.1371/journal.pone.0127347.t004

### Molecular typing

Based on MLVA typing the MRSA could be divided into seven different MLVA types (A-G), which were annotated to CC group by using *spa* typing. The largest group consisted of isolates belonging to CC5-MRSA-SCC*mec*I including 22/31 (71%) isolates. The CC5-MRSA-SCC*mec*I isolates were predominantly found in patients 20/23 (86.9%), whereas a larger diversity was found among HCW (Table 4). MRSA isolates obtained from HCWs primarily contained the smaller SCC*mec* elements type IV and V, among these the European CA-MRSA clone ST80-MRSA-SCC*mec*IV found in one HCW. This isolate was together with a t595 (ST152/ST377) isolate from a patient the only one to contain the PVL gene.

Patients had a higher risk of being colonised with HA-MRSA and HCWs with CA-MRSA [OR = 36.67; 95% CI 3.12–430.33; P = 0.004].

Among identified MRSA clones, the CC5-MRSA-SCC*mec*I was predominant in ED (88.2%) and MD (66.7%), while different genetic lineages were detected in SD: CC5-MRSA-SCC*mec*I (45.4%), CC8-MRSA-SCC*mec*III (18.2%), CC5-MRSA-SCC*mec*V (9.1%), CC22-MRSA-SCC*mec*V (9.1%), CC80-MRSA-SCC*mec*IV (9.1%) and CC152-MRSA-SCC*mec*V (9.1%).

### Evaluation of MRSA screening media

Evaluation of selective MRSA media was based on a total of 42/600 swabs, from where MRSA was grown (confirmed by *mecA* and *nuc* PCRs) (S2 Table). MRSA-ID agar was superior to the other tested media and detected MRSA with a sensitivity/specificity of 95.2% and 99.6% after 48 hours of incubation. Prolonged incubation highly improved sensitivity of all media but had a slightly negative impact on the specificity. Table 5 summarises the results of the comparison of the different media used in the experiment.

It was noticeable that all MRSA isolates belonging to MVLA type C (CC5-MRSA-SCC*mec*V, *spa* type t242) and MVLA type E (ST152/ST377-MRSA-SCC*mec*V, *spa* type t595) grew only on MRSA-ID media, but did not on ORSA and/or oxacillin-MSA agar.

**Table 5. Comparison of MRSA-ID, ORSA and oxacillin-MSA in detection of methicillin-resistant *Staphylococcus aureus* (MRSA) verified by *mecA* and *nuc* PCR.**

| Medium        | Number of MRSA strains detected<br>(number after 48h) | Sensitivity (%)   |      | Specificity (%) |      |
|---------------|-------------------------------------------------------|-------------------|------|-----------------|------|
|               |                                                       | 24 h              | 48 h | 24 h            | 48 h |
| MRSA-ID       | 34 (40)                                               | 80.9              | 95.2 | 100             | 99.6 |
| ORSA          | 29 (35)                                               | 69.1              | 83.3 | 99.1            | 95.1 |
| oxacillin-MSA | 27 (33)                                               | 64.3              | 78.6 | 98.7            | 94.4 |
| Any*          |                                                       | 42 from 600 swabs |      |                 |      |

\*Any = Total number of MRSA isolated.

doi:10.1371/journal.pone.0127347.t005

## Discussion

Emergence, spread and evolution of MRSA are all important aspects of understanding of MRSA epidemiology on a global scale. In the last decade MRSA clones seem to have been spreading more rapidly between continents and countries most likely due to increasing travel activities. To the best of our knowledge, this is the first comprehensive survey of MRSA carriage conducted in Serbia, and thereby provides data from a black spot on the European MRSA map. With the increasing travel activity, detailed knowledge is significant for monitoring and understanding the epidemiology of emerging MRSA clones.

The study of 195 hospitalised patients and 105 HCWs from the largest healthcare facility in our country showed that the prevalence of MRSA in this population was 10.3%. This frequency is high compared to low prevalence countries in Northern Europe and the Netherlands [18] and resemble more what has been reported from high prevalence countries [19,20]. Among Balkan countries, only partial data have been reported from Croatia [21] and Greece [22] with carriage rate ranging from 5.2 to 20%.

The anterior nares are considered to be the primary colonisation site of *S. aureus* [23], and therefore most screening programs require obtaining of a swab specimen from the anterior nares only. However, it has been reported that the throat may be selectively colonised by MRSA in significant number, 12.8–20% [24,25]. Screening of the throat in addition to nasal swabs has increased the sensitivity of detection of *S. aureus* among carriers by 20% to 26% [2]. In our study among MRSA carriers, 32.2% had MRSA only in nares, 32.2% only in throat and 35.5% in both nares and throat. Therefore, exclusion of throat cultures would have resulted in failure to recognise a substantial part, in our case almost 1/3 of the MRSA carriers.

Results from the current study showed that the prevalence of MRSA carriage was higher among hospitalised patients (11.8%) compared to HCWs (7.6%), and reveal association of department with carriage rate. The results of MRSA carriage may vary significantly between different studies and may be due to true difference in MRSA prevalence in the investigated populations. However, differences in study design, like duration of a study, investigation of particular populations (e.g. patients on dialysis), investigation during epidemics, investigation in a particular units (e.g. ICU), media used for isolation of MRSA, time of incubation of media, may have significant impact on obtained results. MRSA carriage among patients was reported to be 5.9% to 15.6% in nares and 10% to 23.1% in throat [8,9]. In the largest review of studies evaluating the MRSA carriage rate among HCWs, mean nasal carriage was 4.1% in 104 studies, ranging from 0% to 59% and data for MRSA pharyngeal carriage among HCWs were reported only in a few studies, and it was 0.3% [25]. In our study among hospitalized patients and HCWs, nasal carriage rate was 7.7% and 5.7% respectively, and throat carriage rate was 8.7% and 3.8% respectively.

HA-MRSA are typically multiresistant, *agr* types 1 or 2, and may carry *mecA* in many types of SCC*mec* elements of which types I, II or III are found in some of the older clonotypes (eg. CC5-MRSA-SCC*mec*I, ST36-MRSA-SCC*mec*II and ST239-MRSA-SCC*mec*III) whereas SCC*mec*IV is found in eg. ST22-MRSA-SCC*mec*IV and ST45-MRSA-SCC*mec*IV [3]. CA-MRSA strains typically share a type IV or V SCC*mec* and frequently the PVL locus [26]. The finding of CC5-MRSA-SCC*mec*I MRSA isolates in high numbers in our screening of patients in particular but also among HCWs clearly indicates that this clone is circulating in the hospital. In addition, findings of six diverse typically CA-MRSA isolates, five from HCWs, indicate that HCWs may also introduce MRSA isolates into the hospital. It is noticeable that these types were primarily detected in HCWs, which may indicate that they do not easily spread in the hospital environment with a high antibiotic selective pressure. The finding of a highly susceptible MLVA type E isolate from a HCW and another resistant MLVA type E isolate from a hospitalised patient may however emphasise the risk that rapid adaptations can occur (Table 4).

CC5-MRSA-SCC*mec*I MRSA (*spa* types *t001* and *t041*) has been previously observed in many European hospitals and is a dominant MRSA clone in the neighbouring countries of Croatia, Hungary and Montenegro [3,27], as is the case in our hospital. In the present study a rare association of PVL-negative CC22-MRSA-SCC*mec*V MRSA was found, which had been previously identified in Saxony [3]. Two MRSA strains belonged to CC152-MRSA-SCC*mec*V and one to CC80-MRSA-SCC*mec*IV, previously identified in Serbia and associated with Balkan countries [28].

Laboratory-based screening for MRSA colonisation of patients and HCWs is a key element in enabling control measures and early therapeutic decisions. Several studies have evaluated the performance of chromogenic media in detecting MRSA in terms of their sensitivity, specificity and speed of detection [4–7, 10]. However, only few studies have been based on primary clinical specimens and direct comparison of results is sometimes difficult due to different techniques of processing the specimens (direct inoculation, broth enrichment in non-selective and selective media) [5–7]. Several studies confirm the importance of broth enrichment for accurate detection of MRSA in clinical sample [5,7] and therefore we decided to use this method for isolation of MRSA in the study.

In our hands MRSA-ID was superior to other tested media. However, to achieve excellent sensitivity results 48h of incubation of MRSA-ID was needed. The same has been noted by other authors [5,7,10]. We observed that two strains that were not recovered on MRSA-ID medium were present low in number on ORSA or oxacillin-MSA medium. Similar observations have been made by others [8]. Prolonged incubation increased sensitivity of other tested media too, but also increased the number of false positive results, which has also been shown by others [6,8,10]. High number of false positive results obtained with ORSA, and MSA may be explained by the fact that identification of *S. aureus* in these media is based on hydrolysis of mannitol, and many microorganisms including coagulase negative staphylococci hydrolyze mannitol. In addition, mannitol negative MRSA strains have been reported [29]. We observed one strain that during primary-isolation was mannitol negative on ORSA and MSA. Detection of *S. aureus* on MRSA-ID is based on the detection of enzyme alpha-glucosidase, and the strain produced typical green colonies on this medium. However, after the strain was subcultured onto MSA it appeared to be mannitol positive, and that was confirmed by ID 32 STAPH (bio-Mérieux, France) identification system. The strain belonged to MLVA cluster A (CC5, *spa* type *t001*).

One limitation of our study is testing only two chromogenic selective media (MRSA-ID and ORSA) and not others (BBL CHROMagar MRSA II, Oxoid Brilliance MRSA agar, MRSASelect, etc.) that show equal or superior results than the media tested in this study [6,7]. Ideally,



more than one batch of each plate should also have been tested which however was not feasible in this study.

## Conclusions

In summary, we demonstrated a high proportion (10.3%) of MRSA among patients and HCWs in the hospital, which places Serbia in middle to high prevalence in the European perspective. We identified a major circulating CC5-MRSA-SCC*mecl* clone in the hospital as well as a variety of other CA-MRSA isolates among HCWs. Increased focus of infection control seems therefore necessary to protect both patients and HCWs in the hospital. Introduction of a screening procedure should include the pharynx, since as much as 1/3 of MRSA carriers were only positive on this site. In order to improve the identification of MRSA, MRSA-ID was the optimal available choice for isolation of MRSA, although the performance of the medium was better after 48h than after 21-24h of incubation.

## Supporting Information

**S1 Table. Raw data.** Distribution of MRSA carriers and non-carriers stratified by population characteristics and characteristics of MRSA strains isolated from MRSA carriers. (DOCX)

**S2 Table. Row data.** Presence of methicillin-resistant *Staphylococcus aureus* (MRSA) strains among study population (patients and healthcare workers) in nasal and/or throat samples and growth of MRSA strains on culture media. (DOCX)

## Acknowledgments

The authors would like to acknowledge support of bioMérieux, for supplying MRSA-ID chromogenic media.

## Author Contributions

Conceived and designed the experiments: IC SS ARL. Performed the experiments: IC SS ARL. Analyzed the data: IC RS AG ARL. Contributed reagents/materials/analysis tools: IC JT ARL. Wrote the paper: IC SS RS ARL.

## References

1. Cosgrove SE, Qi Y, Kaye KS, Harbarth S, Karchmer AW, Carmeli Y (2005) The impact of methicillin resistance in *Staphylococcus aureus* bacteremia on patient outcomes: mortality, length of stay, and hospital charges. *Infect Control Hosp Epidemiol* 26: 166–74. PMID: [15756888](#)
2. Dulon M, Haamann F, Peters C, Schablon A, Nienhaus A (2011) MRSA prevalence in European health-care settings: a review. *BMC Infect Dis* 11:138. doi: [10.1186/1471-2334-11-138](#) PMID: [21599908](#)
3. Monecke S, Coombs G, Shore AC, Coleman DC, Akpaka P, Borg M, et al (2011) A field guide to pandemic, epidemic and sporadic clones of methicillin-resistant *Staphylococcus aureus*. *PLoS One* 6: e17936. doi: [10.1371/journal.pone.0017936](#) PMID: [21494333](#)
4. Nonhoff C, Denis O, Brenner A, Buidin P, Legros N, Thiroux C, et al (2009) Comparison of three chromogenic media and enrichment broth media for the detection of methicillin-resistant *Staphylococcus aureus* from mucocutaneous screening specimens: Comparison of MRSA chromogenic media. *Eur J Clin Microbiol Infect Dis* 28:363–9. doi: [10.1007/s10096-008-0637-9](#) PMID: [18855028](#)
5. Malhotra-Kumar S, Abrahantes JC, Sabiiti W, Lammens C, Vercauteren G, Ieven M, et al (2010) Evaluation of chromogenic media for detection of methicillin-resistant *Staphylococcus aureus*. *J Clin Microbiol* 48: 1040–6. doi: [10.1128/JCM.01745-09](#) PMID: [20164268](#)

6. Van Vaerenbergh K, Cartuyvels R, Coppens G, Frans J, Van den Abeele AM, De Beenhouwer H, et al (2010) Performance of a new chromogenic medium, BBL CHROMagar MRSA II (BD), for detection of methicillin-resistant *Staphylococcus aureus* in screening samples. *J Clin Microbiol* 48: 1450–1. doi: [10.1128/JCM.02103-09](https://doi.org/10.1128/JCM.02103-09) PMID: [20181915](https://pubmed.ncbi.nlm.nih.gov/20181915/)
7. Verkade E, Ferket M, Kluytmans (2011) Clinical evaluation of Oxoid Brilliance MRSA agar in comparison with bioMerieux MRSA ID medium for detection of livestock—associated methicillin-resistant *Staphylococcus aureus*. *J Med Microbiol* 60: 905–908. doi: [10.1099/jmm.0.021964-0](https://doi.org/10.1099/jmm.0.021964-0) PMID: [21415201](https://pubmed.ncbi.nlm.nih.gov/21415201/)
8. Perry JD, Davies A, Butterworth LA, Hopley AL, Nicholson A, Gould FK (2004) Development and evaluation of a chromogenic agar medium for methicillin-resistant *Staphylococcus aureus*. *J Clin Microbiol* 42: 4519–23. PMID: [15472303](https://pubmed.ncbi.nlm.nih.gov/15472303/)
9. Nahimana I, Francioli P, Blanc DS (2006) Evaluation of three chromogenic media (MRSA-ID, MRSA-Select and CHROMagar MRSA) and ORSAB for surveillance cultures of methicillin-resistant *Staphylococcus aureus*. *Clin Microbiol Infect* 12: 1168–74. PMID: [17121622](https://pubmed.ncbi.nlm.nih.gov/17121622/)
10. Diederer BM, van Leest ML, van Duijn I, Willemsse P, van Keulen PH, Kluytmans JA (2006) Performance of MRSA ID, a new chromogenic medium for detection of methicillin-resistant *Staphylococcus aureus*. *J Clin Microbiol* 44: 586–8. PMID: [16455917](https://pubmed.ncbi.nlm.nih.gov/16455917/)
11. Brakstad OG, Aasbakk K, Maeland JA (1992) Detection of *Staphylococcus aureus* by polymerase chain reaction amplification of the *nuc* gene. *J Clin Microbiol* 30: 1654–60. PMID: [1629319](https://pubmed.ncbi.nlm.nih.gov/1629319/)
12. Bignardi GE, Woodford N, Chapman A, Johnson AP, Speller DC (1996) Detection of the *mec-A* gene and phenotypic detection of resistance in *Staphylococcus aureus* isolates with borderline or low-level methicillin resistance. *J Antimicrob Chemother* 37: 53–63. PMID: [8818846](https://pubmed.ncbi.nlm.nih.gov/8818846/)
13. Sabat A, Krzyszton-Russjan J, Strzalka W, Filipek R, Kosowska K, Hryniewicz W, et al (2003) New method for typing *Staphylococcus aureus* strains: multiple-locus variable-number tandem repeat analysis of polymorphism and genetic relationships of clinical isolates. *J Clin Microbiol* 41: 1801–4. PMID: [12682193](https://pubmed.ncbi.nlm.nih.gov/12682193/)
14. Harmsen D, Claus H, Witte W, Rothgänger J, Claus H, Turnwald D, et al (2003) Typing of methicillin-resistant *Staphylococcus aureus* in a university hospital setting by using novel software for *spa* repeat determination and database management. *J Clin Microbiol* 41: 5442–8. PMID: [14662923](https://pubmed.ncbi.nlm.nih.gov/14662923/)
15. Boye K, Bartels MD, Andersen IS, Møller JA, Westh H (2007) A new multiplex PCR for easy screening of methicillin-resistant *Staphylococcus aureus* SCC $mec$  types I–V. *Clin Microbiol Infect* 13: 725–7. PMID: [17403127](https://pubmed.ncbi.nlm.nih.gov/17403127/)
16. Lina G, Boutite F, Tristan A, Bes M, Etienne J, Vandenesch F (2003) Bacterial competition for human nasal cavity colonization: role of *Staphylococcal agr* alleles. *Appl Environ Microbiol* 69: 18–23. PMID: [12513972](https://pubmed.ncbi.nlm.nih.gov/12513972/)
17. Lina G, Piemont Y, Godail-Gamot F, Bes M, Peter MO, Gauduchon V, et al (1999) Involvement of Panton-Valentine leukocidin-producing *Staphylococcus aureus* in primary skin infections and pneumonia. *Clin Infect Dis* 29: 1128–32. PMID: [10524952](https://pubmed.ncbi.nlm.nih.gov/10524952/)
18. den Heijer CD, van Bijnen EM, Paget WJ, Pringle M, Goossens H, Bruggeman CA, et al (2013) Prevalence and resistance of commensal *Staphylococcus aureus*, including methicillin-resistant *S. aureus*, in nine European countries: a cross-sectional study. *Lancet Infect Dis* 13: 409–15. doi: [10.1016/S1473-3099\(13\)70036-7](https://doi.org/10.1016/S1473-3099(13)70036-7) PMID: [23473661](https://pubmed.ncbi.nlm.nih.gov/23473661/)
19. Amorim ML, Vasconcelos C, Oliveira DC, Azevedo A, Calado E, Faria NA, et al (2009) Epidemiology of methicillin-resistant *Staphylococcus aureus* (MRSA) nasal colonization among patients and healthcare workers in a Portuguese hospital: a pre-intervention study toward the control of MRSA. *Microb Drug Resist* 15: 19–26. doi: [10.1089/mdr.2009.0881](https://doi.org/10.1089/mdr.2009.0881) PMID: [19296773](https://pubmed.ncbi.nlm.nih.gov/19296773/)
20. Bogut A, Koziol-Montewka M, Baranowicz I, Jówiak L, Ksiazek A, Al-Doori Z, et al (2007) Characterisation of *Staphylococcus aureus* nasal and skin carriage among patients undergoing haemodialysis treatment. *New Microbiol* 30: 149–54. PMID: [17619259](https://pubmed.ncbi.nlm.nih.gov/17619259/)
21. Fiolic Z, Bosnjak Z, Snajdar I, Gregorek AC, Kalenic S, Budimir A (2012) The screening of methicillin-resistant *Staphylococcus aureus* in vascular surgery patients: a comparison of molecular testing and broth-enriched culture. *Chemotherapy* 58: 330–6. doi: [10.1159/000343454](https://doi.org/10.1159/000343454) PMID: [23147252](https://pubmed.ncbi.nlm.nih.gov/23147252/)
22. Pan A, Lee A, Cooper B, Chalfine A, Daikos GL, Garilli S, et al (2013) Risk factors for previously unknown methicillin-resistant *Staphylococcus aureus* carriage on admission to 13 surgical wards in Europe. *J Hosp Infect* 83: 107–13. doi: [10.1016/j.jhin.2012.09.020](https://doi.org/10.1016/j.jhin.2012.09.020) PMID: [23201397](https://pubmed.ncbi.nlm.nih.gov/23201397/)
23. Wertheim HF, Melles DC, Vos MC, van Leeuwen W, van Belkum A, Verbrugh HA, et al (2005) The role of nasal carriage in *Staphylococcus aureus* infections. *Lancet Infect Dis* 5: 751–62. PMID: [16310147](https://pubmed.ncbi.nlm.nih.gov/16310147/)
24. Nilsson P, Ripa T (2006) *Staphylococcus aureus* throat colonization is more frequent than colonization in the anterior nares. *J Clin Microbiol* 44: 3334–9. PMID: [16954269](https://pubmed.ncbi.nlm.nih.gov/16954269/)

25. Albrich WC, Harbarth S (2008) Health-care workers: source, vector, or victim of MRSA? *Lancet Infect Dis* 8: 289–301. doi: [10.1016/S1473-3099\(08\)70097-5](https://doi.org/10.1016/S1473-3099(08)70097-5) PMID: [18471774](https://pubmed.ncbi.nlm.nih.gov/18471774/)
26. Vandenesch F, Naimi T, Enright MC, Lina G, Nimmo GR, Heffernan H, et al (2003) Community-acquired methicillin-resistant *Staphylococcus aureus* carrying Panton-Valentine leukocidin genes: worldwide emergence. *Emerg Infect Dis* 9: 978–84. PMID: [12967497](https://pubmed.ncbi.nlm.nih.gov/12967497/)
27. Budimir A, Deurenberg RH, Bosnjak Z, Stobberingh EE, Cetkovic H, Kalenic S (2010) A variant of the Southern German clone of methicillin-resistant *Staphylococcus aureus* is predominant in Croatia. *Clin Microbiol Infect* 16: 1077–83. doi: [10.1111/j.1469-0691.2009.03042.x](https://doi.org/10.1111/j.1469-0691.2009.03042.x) PMID: [19732087](https://pubmed.ncbi.nlm.nih.gov/19732087/)
28. Cirkovic I, Sørum M, Radenkovic D, Vlahovic MS, Larsen AR (2013) National surveillance reveals findings of Panton-Valentine leukocidin positive methicillin-resistant *Staphylococcus aureus* in Serbia. *J Med Microbiol* 62: 342–4. doi: [10.1099/jmm.0.051219-0](https://doi.org/10.1099/jmm.0.051219-0) PMID: [23105023](https://pubmed.ncbi.nlm.nih.gov/23105023/)
29. Shittu A, Lin J, Morrison D (2007) Molecular identification and characterization of mannitol-negative methicillin-resistant *Staphylococcus aureus*. *Diagn Microbiol Infect Dis* 57: 93–5. PMID: [16854554](https://pubmed.ncbi.nlm.nih.gov/16854554/)
